# Function Annotation of Hepatic Retinoid x Receptor $\alpha$ Based on Genome-Wide DNA Binding and Transcriptome Profiling

Qi Zhan<sup>1</sup>, Yaping Fang<sup>3</sup>, Yuqi He<sup>2</sup>, Hui-Xin Liu<sup>2</sup>, Jianwen Fang<sup>3</sup>, Yu-Jui Yvonne Wan<sup>1,2\*</sup>

**1** Department of Gastroenterology Hepatology, Guangzhou First Municipal People's Hospital, Guangzhou Medical College, Guangzhou, Guangdong Province, China, **2** Department of Medical Pathology and Laboratory Medicine, University of California Davis, Davis Health Systems, Sacramento, California, United States of America, **3** Applied Bioinformatics Laboratory, University of Kansas, Lawrence, Kansas, United States of America

## Abstract

**Background:** Retinoid x receptor  $\alpha$  (RXR $\alpha$ ) is abundantly expressed in the liver and is essential for the function of other nuclear receptors. Using chromatin immunoprecipitation sequencing and mRNA profiling data generated from wild type and RXR $\alpha$ -null mouse livers, the current study identifies the bona-fide hepatic RXR $\alpha$  targets and biological pathways. In addition, based on binding and motif analysis, the molecular mechanism by which RXR $\alpha$  regulates hepatic genes is elucidated in a high-throughput manner.

**Principal Findings:** Close to 80% of hepatic expressed genes were bound by RXR $\alpha$ , while 16% were expressed in an RXR $\alpha$ -dependent manner. Motif analysis predicted direct repeat with a spacer of one nucleotide as the most prevalent RXR $\alpha$  binding site. Many of the 500 strongest binding motifs overlapped with the binding motif of specific protein 1. Biological functional analysis of RXR $\alpha$ -dependent genes revealed that hepatic RXR $\alpha$  deficiency mainly resulted in up-regulation of steroid and cholesterol biosynthesis-related genes and down-regulation of translation- as well as anti-apoptosis-related genes. Furthermore, RXR $\alpha$  bound to many genes that encode nuclear receptors and their cofactors suggesting the central role of RXR $\alpha$  in regulating nuclear receptor-mediated pathways.

**Conclusions:** This study establishes the relationship between RXR $\alpha$  DNA binding and hepatic gene expression. RXR $\alpha$  binds extensively to the mouse genome. However, DNA binding does not necessarily affect the basal mRNA level. In addition to metabolism, RXR $\alpha$  dictates the expression of genes that regulate RNA processing, translation, and protein folding illustrating the novel roles of hepatic RXR $\alpha$  in post-transcriptional regulation.

**Citation:** Zhan Q, Fang Y, He Y, Liu H-X, Fang J, et al. (2012) Function Annotation of Hepatic Retinoid x Receptor  $\alpha$  Based on Genome-Wide DNA Binding and Transcriptome Profiling. PLoS ONE 7(11): e50013. doi:10.1371/journal.pone.0050013

**Editor:** Jean-Marc A. Lobaccaro, Clermont Université, France

**Received:** September 6, 2012; **Accepted:** October 19, 2012; **Published:** November 15, 2012

**Copyright:** © 2012 Zhan et al. This is an open-access article distributed under the terms of the Creative Commons Attribution License, which permits unrestricted use, distribution, and reproduction in any medium, provided the original author and source are credited.

**Funding:** This work was supported by the National Institutes of Health (DK092100 and CA053596 to YYW). The funders had no role in study design, data collection and analysis, decision to publish, or preparation of the manuscript.

**Competing Interests:** The authors have declared that no competing interests exist.

\* E-mail: yjywan@ucdavis.edu

## Introduction

Retinoid x receptor (RXR) plays a critical role in metabolism, development, differentiation, proliferation, and cell death by regulating gene expression [1,2]. The expression profile of RXRs and their downstream signaling is altered in a variety of diseases including breast cancer [3] and viral hepatitis [4]. Correspondingly, RXR agonists are implicated in cancer prevention, antiviral therapy, dermatological disease, and metabolic syndromes [2,5,6]. Mediated via RXRs ( $\alpha$ ,  $\beta$ , and  $\gamma$ ) and retinoic acid receptors ( $\alpha$ ,  $\beta$ , and  $\gamma$ ), retinoic acid exerts its biological effects. In addition to RARs, RXR $\alpha$  is crucial for many other receptors to work. The receptors for fatty acids, oxysterols, bile acids, vitamin D, etc. form dimers with RXRs to regulate gene transcription. RXR $\alpha$  is essential for fetal morphogenesis [7]. Global RXR $\alpha$  knockout is embryonically lethal and the embryos develop myocardial hypoplasia with reduced liver size at gestational day 12.5 [8]. RXR $\alpha$  is predominantly expressed in the liver [7]. Hepatocyte RXR $\alpha$  knockout mice were produced to study its role in the liver

[9]. RXR $\alpha$ -deficient mice have compromised lipid [10], carbohydrate [11], xenobiotic [12], and amino acid homeostasis [13]. In addition, hepatocyte RXR $\alpha$  is also implicated in liver steatosis and inflammation as well as regeneration [14–17]. Specifically, hepatocyte RXR $\alpha$ -deficient mice are more susceptible than wild type mice to alcohol and non-alcohol-induced steatohepatitis [13–15]. Partial hepatectomy-induced liver regeneration is also hampered due to hepatic RXR $\alpha$  deficiency [16]. Liver is the organ that stores and converts retinol to its biological active form i.e. retinoic acid. Liver also produces binding proteins to deliver retinoic acid to target sites. Furthermore, hepatocytes express high level of RXR $\alpha$ . Thus, it is pivotal to understand the biological function of RXR $\alpha$  in the liver.

The current study determines genome-wide RXR $\alpha$  binding in normal mouse livers by chromatin immunoprecipitation using specific anti-RXR $\alpha$  antibody followed by next generation sequencing (ChIP-seq). In addition, microarray was performed to identify genes that are differentially expressed in wild type and

RXR $\alpha$ -null mouse livers. Combining the two datasets, we established the relationship between hepatic RXR $\alpha$ -DNA binding and RXR $\alpha$ -dependent gene expression. This global profiling of RXR $\alpha$  binding along with gene expression not only allows us to capture all RXR $\alpha$  downstream targets and pathways, but also helps us to understand the molecular mechanism by which hepatic RXR $\alpha$  regulates gene expression.

## Materials and Methods

### Animals and Tissues

The generation of hepatocyte RXR $\alpha$ -deficient mice was described in previous publications [9,10]. The *LoxP* sequences were inserted into introns flanking the fourth exon of the RXR $\alpha$  gene and DNA binding domain of the gene is deleted after crossing the *floxed RXR $\alpha$*  allele against a transgenic line in which the *cre* recombinase is expressed under the control of the albumin promoter. The mutant mice express a truncated protein that lacks the DNA binding domain. However, the ligand binding domain remains intact. Mouse livers were collected at 10 AM from 12-week-old wild type (WT) and hepatocyte RXR $\alpha$  knockout (KO) mice, which have C57BL/6 genetic background. Tissues were snap frozen in liquid nitrogen and kept at  $-80^{\circ}\text{C}$  for future use. Animal protocols and procedures were approved by the Institutional Animal Care and Use Committee (IACUC) at the University of Kansas Medical Center and the University of California, Davis.

### RNA Preparation and Microarray

Total RNA was extracted using TRIzol Reagent (Invitrogen Co., CA) and purified with the RNeasy Mini Kit (Qiagen Inc., CA). The quantity and quality of the total RNA were assessed by Bioanalyzer 2100 (Agilent Technologies, CA). Complementary DNA was made using High Capacity RNA-to-cDNA Kit (Applied Biosystems, CA). Affymetrix chips (MOE 430A 2.0) that covered about 14,000 mouse genes were used. Microarray ( $n = 3$  per group) and data processing as well as the methods used for data validation were described in our previous publication [18]. By Student *t*-test, genes differentially expressed in wild type and RXR $\alpha$ -knockout mouse livers with *p* value less than 0.05 were identified as RXR $\alpha$ -dependent genes.

### Chromatin immunoprecipitation sequencing (ChIP-Seq) and ChIP-qPCR

Frozen livers were fixed in 1% formaldehyde (pH = 7) for 15 minutes before being quenched with 0.125 M glycine. Following cell lysis, the nuclear fraction was extracted and sonicated to produce 300–500 base-pair (bp) DNA fragments. Genomic DNA (Input) was prepared by treating aliquots of chromatin with RNase, proteinase K and heated for de-cross-linking, followed by ethanol precipitation. Chromatin (30  $\mu\text{g}$ ) was precleared by Dynase beads (Invitrogen Co., CA) before incubation with a ChIP-quality anti-RXR $\alpha$  antibody (Santa Cruz, CA). An antibody to IgG (Santa Cruz, CA) and RNA Pol II (Millipore, MA) was used as negative and positive control, respectively. Samples were incubated with prepared Dynase beads at  $4^{\circ}\text{C}$  overnight, followed by de-crosslinking and purification.

**Table 1.** Comparison of RXR $\alpha$  Binding Sites.

| Nuclear Receptor | Target Gene                  | Our data location (motif) | Reported data location (motif) | Reference |
|------------------|------------------------------|---------------------------|--------------------------------|-----------|
| RARs             | <i>Prcka</i>                 | –19 (NK)                  | –93~–65 (NR)                   | [23]      |
|                  | <i>Cyp26a1</i>               | –1862 (DR5)               | –2 kb (DR5)                    | [24]      |
|                  | <i>RAR<math>\beta</math></i> | –341 (DR5)                | –59 (DR5)                      | [25]      |
| FXR              | <i>Nr0b2</i>                 | –271 (IR1, DR3)           | –320~–220 (NR)                 | [26]      |
|                  | <i>Abcb11</i>                | –220 ~ 250 (IR1)          | –240~–140 (NR)                 | [26]      |
| LXR              | <i>Abca1</i>                 | –183 (DR3, 4)             | –70 (DR4)                      | [27]      |
|                  | <i>Fasn</i>                  | –658 (DR4)                | –660 (DR4)                     | [28]      |
|                  | <i>Pltp</i>                  | –2.2 (ER3)                | –2.6 kb (DR4)                  | [29]      |
| PPARs            | <i>ACOX1</i>                 | –286 (NK)                 | –550 (DR1)                     | [30]      |
|                  | <i>ALDH3A2</i>               | –4.69 kb (DR1)            | –4.63 kb (DR1)                 | [31]      |
|                  | <i>Nfkbia</i>                | –111 (NK)                 | $\geq -1.9$ kb (DR1)           | [32]      |
| PXR              | <i>Cyp3a11</i>               | –1.5 kb (ER1)             | –1.5 kb (NR)                   | [33]      |
|                  | <i>Slc01a4</i>               | –10 kb (DR3, ER3)         | –10 kb (NR)                    | [33]      |
|                  | <i>Abcc3</i>                 | 3.8 kb (IR3, DR4)         | 3.8 kb (NR)                    | [33]      |
| CAR              | <i>Cyp2b10</i>               | –2.3 kb (DR4, ER1)        | –2.3 kb (NR)                   | [34]      |
|                  | <i>Abcc2</i>                 | –97 (NK)                  | –400 (ER8)                     | [35]      |
| VDR              | <i>Spp1</i>                  | –701 (DR3)                | –761 (DR3)                     | [36]      |
|                  | <i>Cyp24a1</i>               | –322 (NK)                 | –265 (DR3)                     | [37]      |
|                  | <i>Pckra</i>                 | 114 kb (ER3, DR1)         | 127 kb (NR)                    | [38]      |
| TR               | <i>Cyp7a1</i>                | –3 kb (DR0)               | –3 kb (DR0, DR4)               | [39]      |
|                  | <i>Thrsp</i>                 | –1375 (DR0, IR4)          | –1385 (NR)                     | [40,41]   |
|                  | <i>Egr</i>                   | –90 (IR5)                 | –112~–77 (IR)                  | [42]      |

DR, direct repeat; ER, everted repeat; Hu, human; IR, inverted repeat; kb, kilo-base pair; Ms, mouse; NK, not known NR, not reported.

doi:10.1371/journal.pone.0050013.t001

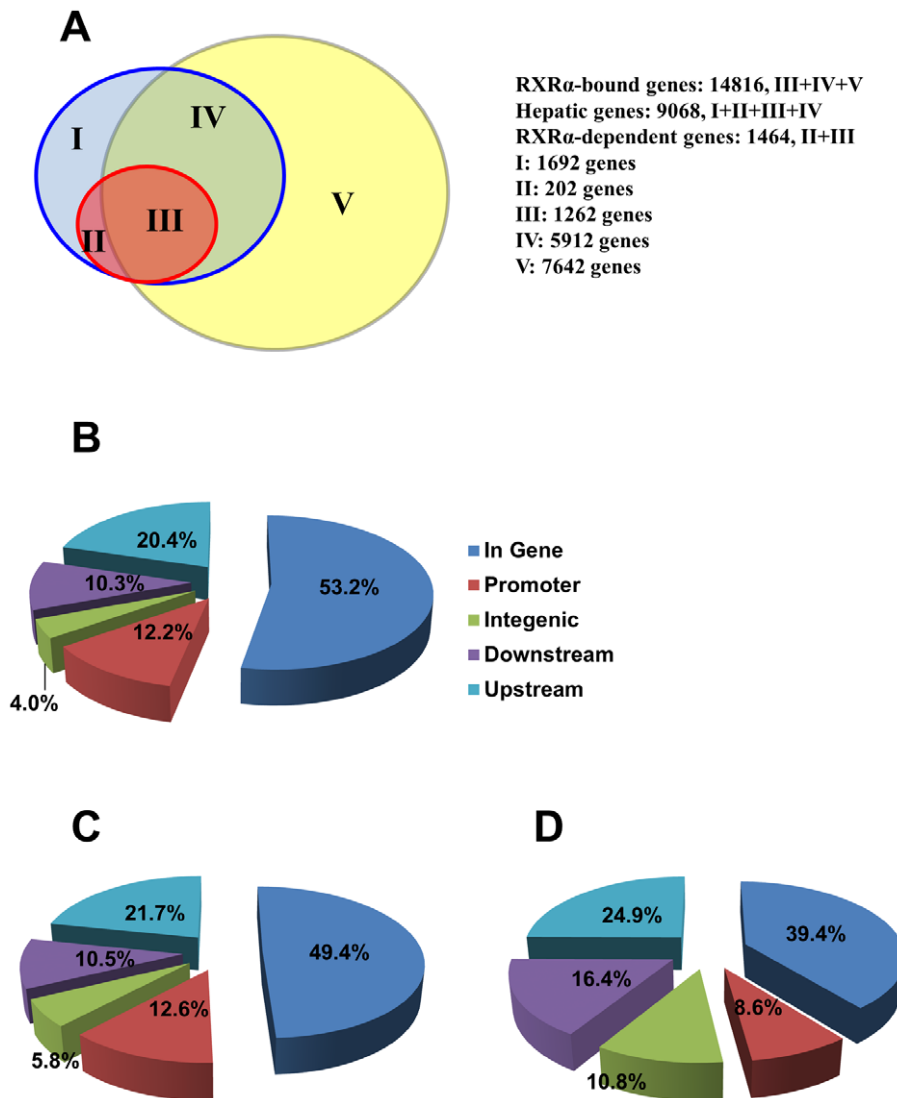

**Figure 1. Global analysis of ChIP-seq and microarray data.** (A) Venn diagrams of RXR $\alpha$ -bound genes (III+IV+V), hepatic genes (I+II+III+IV), and RXR $\alpha$ -dependent genes (II+III). RXR $\alpha$  binding location for (B) RXR $\alpha$ -dependent, (C) RXR $\alpha$ -independent hepatic expressed, and (D) non-hepatic expressed genes. In gene: peak summit located within the coding region; Promoter: peak summit located within  $-2$  kb  $\sim 0$  bp to the transcription start site (TSS); Upstream: peak summit located within  $-100$  kb  $\sim -2$  kb to the TSS; Downstream: peak summit located within  $0$  bp  $\sim 100$  kb to  $3'$  end of the gene; Integenic: peak summit located outside the above mentioned regions. Red circle: RXR $\alpha$ -dependent genes; Blue circle: hepatic genes; Yellow circle: RXR $\alpha$ -bound genes. I: RXR $\alpha$ -independent genes and lack of RXR $\alpha$  binding; II: RXR $\alpha$ -dependent genes but lack of RXR $\alpha$  binding; III: RXR $\alpha$ -dependent genes that have RXR $\alpha$  binding; IV: RXR $\alpha$ -independent genes that have RXR $\alpha$  binding; V: non-hepatic genes that have RXR $\alpha$  binding. doi:10.1371/journal.pone.0050013.g001

DNA fragment library was size-selected (175–225 bp) on an agarose gel. Amplified DNAs (DNA library) were sequenced on the Illumina Genome Analyzer II. For ChIP-seq data validation, DNA fragments generated based on above mentioned method ( $n = 3$ ) were quantified by real-time PCR with Power SYBR<sup>®</sup> Green PCR Master Mix (Life Technologies Co., CA).

### Data Analysis

Primary image analysis and base calling were performed using Genome Analyzer Pipeline Software (Illumina Inc., CA). All sequenced reads were aligned to mm9 mouse reference genome using bowtie version 0.12.7 [19]. Only uniquely mapped reads were included. Regions with reads enrichment were detected using the Model-based Analysis of ChIP-Seq (MACS v 1.4.1) method [20]. Non-specific peaks with false discovery ratio (FDR) greater

than 0.1 were eliminated by comparing them with the IgG background. Peaks were further split by Mali Salmon's Peak Splitter (<http://www.ebi.ac.uk/bertone/software.html>) and filtered by  $p$ -value of Poisson distribution lower than  $10^{-5}$ . The peak annotation was based on the UCSC genome NCBI/mm9 database. Relative to the transcription start site (TSS) or  $3'$  end of the gene, the peak locations were defined as ingene (summit located within the coding region), promoter ( $-2$  kb  $\sim 0$  bp to the TSS), downstream ( $0 \sim 100$  kb to the  $3'$  end), upstream ( $-100$  kb  $\sim -2$  kb to the TSS), or intergenic (more than 100 kb away from TSS or  $3'$  end).

### Motif and Pathway Analysis

The sequences that were 100 bp up and downstream from the summits of the top 500 peaks, which had the highest peak scores,

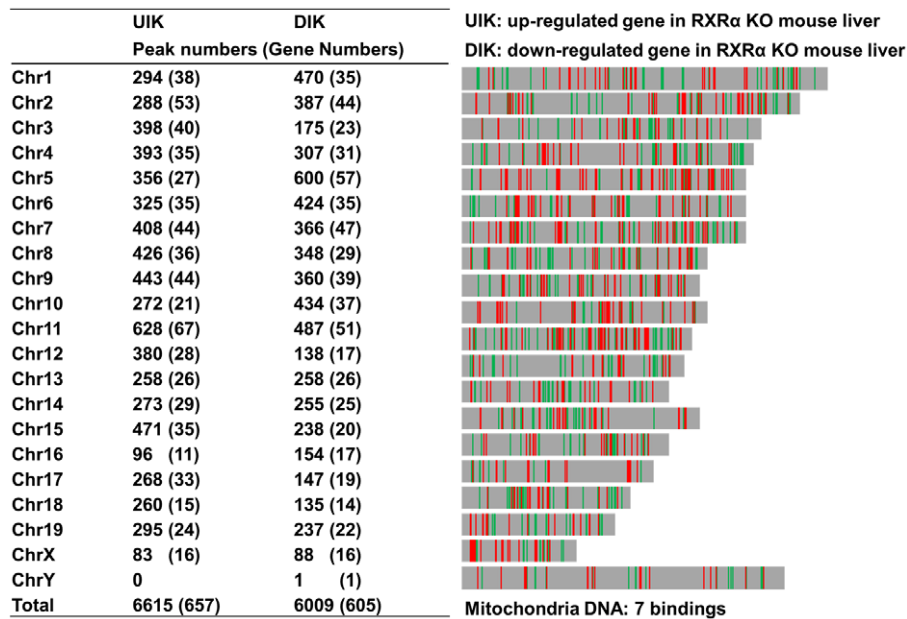

**Figure 2. Chromosomal distribution of RXR $\alpha$  peaks in RXR $\alpha$ -dependent genes in mouse liver.** Each bar represents an RXR $\alpha$  binding site on the mouse genome. UIK (green): up-regulated in RXR $\alpha$  KO liver; DIK (red): down-regulated in RXR $\alpha$  KO liver. doi:10.1371/journal.pone.0050013.g002

were subjected to motif analysis using by MEME-ChIP (Multiple EM for Motif Elicitation) [21]. Furthermore, a Hidden Markov Model (HMM) was established based on nuclear receptor binding sites from published work [22] and JASPAR CORE ([http://jaspar.cgb.ki.se/cgi-bin/jaspar\\_db.pl](http://jaspar.cgb.ki.se/cgi-bin/jaspar_db.pl)) to predict the specific motif information for all of the RXR $\alpha$  binding sites. All of the biological function and pathway analyses were performed using the Functional Annotation Tool in DAVID (DAVID; <http://www.david.niaid.nih.gov>). Functional pathways or process with  $p < 0.05$  and Bonferroni value  $< 0.1$  were accepted.

### Statistical Analysis

For ChIP-qPCR data and microarray data, the difference between two groups was analyzed by Student's  $t$  test.  $P < 0.05$  was considered statistically significant.

## Results

### Validation of RXR $\alpha$ binding sites discovered by ChIP-seq

Genes with known RXR $\alpha$  heterodimer response elements were found to be bound by RXR $\alpha$  at similar locations in our ChIP-seq data to what has been previously reported (Table 1). To further validate the ChIP-seq results, RXR $\alpha$  binding sites with various peak scores were randomly selected for confirmation by ChIP-qPCR. Peak scores were used to scale the strength of RXR $\alpha$  binding. The results showed 100%, 88%, and 87.5% confirmation for peaks that had strong (peak score  $\geq 200$ ), medium ( $100 \leq$  peak score  $< 200$ ), and weak (peak score  $< 100$ ) bindings, respectively [23–42].

### Global RXR $\alpha$ binding and RXR $\alpha$ -dependent gene expression in mouse livers

Microarray data showed that there were 9068 genes with detectable signals (mRNA levels), which are referred to as “hepatic genes”. Among these, 768 were significantly up-regulated (UIK: up-regulated in KO) and 696 genes were down-regulated (DIK:

down-regulated in KO) in the hepatocyte RXR $\alpha$  KO mouse livers. Thus, 16.14% of hepatic genes (1464 out of 9068) were expressed in an RXR $\alpha$ -dependent manner.

There were 109971 confident RXR $\alpha$  peaks detected in 14816 genes in the mouse liver. The average is 7.4 peaks per gene. Remarkably, 79.1% (7174) of the hepatic genes were bound by RXR $\alpha$  (Figure 1A), which includes 657 (85.5%) UIK and 605 (86.9%) DIK genes. However, 7642 RXR $\alpha$ -bound genes did not have significant signals by microarray in either WT or RXR $\alpha$  KO mouse livers and we refer to those genes as “non-hepatic genes”.

The frequencies of promoter peaks are similar for RXR $\alpha$ -dependent (12.2%) and -independent (12.6%) genes (Figure 1B and C). RXR $\alpha$  binding sites occurred more frequently in promoter (12.6% *vs.* 8.6%) and coding (49.4% *vs.* 39.4%) regions for the hepatic than non-hepatic genes (Figure 1C and D). Conversely, RXR $\alpha$  bound more frequently to the intergenic, up- and downstream regions for the non-hepatic than the hepatic genes. Thus, it seems that the binding location of RXR $\alpha$  could be a determinant factor for the level of hepatic gene expression.

In terms of chromosomal distribution, RXR $\alpha$  binding occurred more frequently on chromosome 5 and 11 (956 and 1115 RXR $\alpha$  binding sites, respectively) than others (Figure 2). Notably, gene function analysis demonstrated that 32% of RXR $\alpha$ -bound genes on chromosome 5 are associated with alternative splicing, while 52% of RXR $\alpha$ -bound genes on chromosome 11 encode phosphoproteins suggesting the role of RXR $\alpha$  in post-transcriptional modification. In addition, seven RXR $\alpha$  binding sites (peak scores ranging 170–470) were mapped on mitochondrial DNA in the areas where genes were not identified by the UCSD Gene Browser. 171 peaks were matched on X chromosome, while only 1 peak was noted on Y chromosome.

### Motif Analysis of RXR $\alpha$ binding sites

Since RXR $\alpha$  dimerizes with multiple nuclear receptors, its binding sites are composed of diverse binding motifs. The result predicted by the Hidden Markov Model identified DR1 (12.5%) as the most common motif for RXR $\alpha$  binding in mouse liver

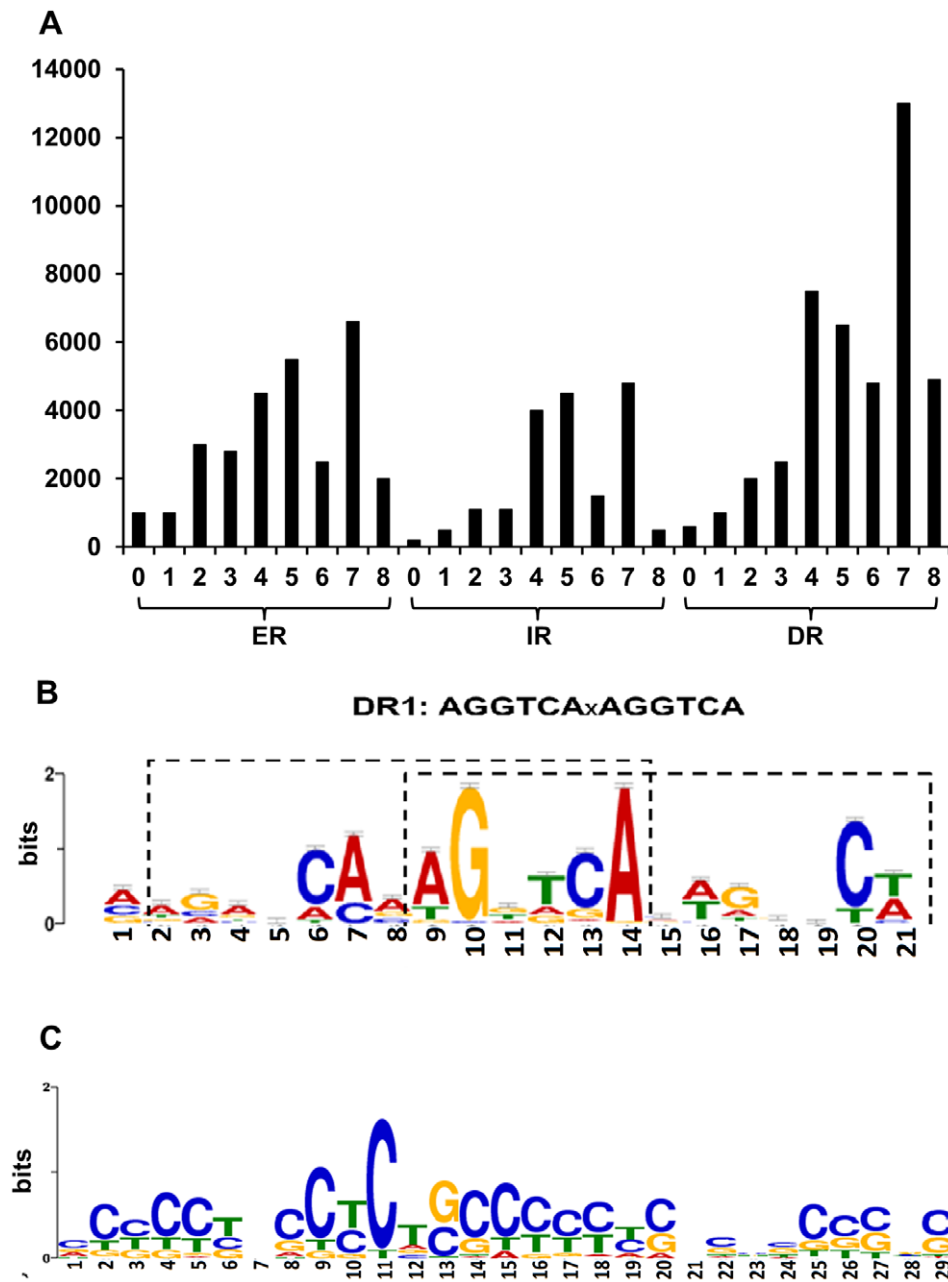

**Figure 3. Motif Analyses.** (A) Global profiling of RXR $\alpha$  binding motifs in mouse liver genome predicted by Hidden Markov Model. DR: direct repeat; ER: everted repeat; IR: inverted repeat. (B) Out of the top 500 strongest bindings, the most common motif contains three half nuclear receptor binding sites, which may form two overlapped DR1s sharing the middle half site. (C) The other common motif contains a GC box that matches to the Sp1 binding site.

doi:10.1371/journal.pone.0050013.g003

followed by DR4, inverted repeat (IR) 1, DR3, and IR3. Furthermore, spacers 1, 3, and 4 were relatively more prevalent than other spacers (Figure 3A). The results of the MEME-ChIP analysis for the 500 strongest bindings demonstrated that one of the most common motifs contains three half nuclear receptor binding sites, which may form two overlapped DR1s ( $p = 7.52E-6$ ) (Figure 3B). The other identified sequence contains a GC box that matches to the motif of specific protein 1 (Sp1) binding site ( $p = 2.28E-5$ ) (Figure 3C) [43].

### Functional analysis of RXR $\alpha$ based on genetic profiling of hepatocyte RXR $\alpha$ -deficient mouse livers

Biological functional analysis of both UIK and DIK genes demonstrated that RXR $\alpha$ -dependent genes participated predominantly in oxidation/reduction, lipid metabolism, generation of precursor metabolites and energy, cofactor metabolism, carboxylic acid biosynthesis, organic acid biosynthesis, coenzyme metabolism, protein folding, electron transport chain, translation and apoptosis. Among these, an average of 84% of the genes was bound by RXR $\alpha$  (Table 2). The ratio of UIK and DIK genes in each pathway revealed a distinct role for hepatic RXR $\alpha$  in



**Table 2.** Biological Functional Pathway Analysis of RXR $\alpha$ -dependent Genes.

| Biological Processes* (Gene Number)                 | Gene Numbers            |                  |                  | $p$ value | Bonferroni |
|-----------------------------------------------------|-------------------------|------------------|------------------|-----------|------------|
|                                                     | RXR $\alpha$ -Bound (%) | UIK <sup>#</sup> | DIK <sup>#</sup> |           |            |
| oxidation reduction (120)                           | 109 (90.8)              | 65               | 55               | 1.50E-18  | 4.40E-15   |
| translation (50)                                    | 24 (48.0)               | 10               | 40               | 1.30E-05  | 3.70E-02   |
| lipid biosynthetic process (48)                     | 42 (87.5)               | 32               | 16               | 5.40E-07  | 1.60E-03   |
| generation of precursor metabolites and energy (47) | 40 (85.1)               | 27               | 20               | 9.70E-08  | 2.80E-04   |
| fatty acid metabolic process (41)                   | 39 (95.1)               | 19               | 22               | 1.50E-09  | 4.40E-06   |
| steroid metabolic process (36)                      | 31 (86.1)               | 26               | 10               | 1.60E-08  | 4.70E-05   |
| cofactor metabolic process (36)                     | 33 (91.7)               | 20               | 16               | 3.90E-07  | 1.10E-03   |
| carboxylic acid biosynthetic process (29)           | 28 (96.6)               | 18               | 11               | 2.90E-06  | 8.50E-03   |
| organic acid biosynthetic process (29)              | 28 (96.6)               | 18               | 11               | 2.90E-06  | 8.50E-03   |
| coenzyme metabolic process (29)                     | 29 (100)                | 17               | 12               | 3.90E-06  | 1.10E-02   |
| protein folding (26)                                | 15 (57.7)               | 10               | 16               | 1.20E-05  | 3.30E-02   |
| electron transport chain (24)                       | 21 (87.5)               | 14               | 10               | 1.20E-05  | 3.50E-02   |
| steroid biosynthetic process (22)                   | 17 (77.3)               | 17               | 5                | 4.80E-08  | 1.40E-04   |
| sterol metabolic process (22)                       | 18 (81.8)               | 18               | 4                | 2.20E-07  | 6.50E-04   |
| anti-apoptosis (20)                                 | 18 (90.0)               | 6                | 14               | 3.30E-05  | 9.30E-02   |
| cholesterol metabolic process (19)                  | 15 (78.9)               | 15               | 4                | 4.10E-06  | 1.20E-02   |
| sterol biosynthetic process (14)                    | 10 (71.4)               | 14               | 0                | 1.10E-07  | 3.30E-04   |
| cholesterol biosynthetic process (11)               | 7 (63.6)                | 11               | 0                | 3.30E-06  | 9.50E-03   |

\*Biological processes were obtained from DAVID functional annotation.

# UIK: up-regulated gene in RXR $\alpha$  KO mouse liver; DIK: down-regulated gene in RXR $\alpha$  KO mouse liver.

doi:10.1371/journal.pone.0050013.t002

regulating lipid metabolism and apoptosis. For example, all of the sterol and cholesterol biosynthetic-related genes and most of the steroid and lipid biosynthetic-related genes were up-regulated in KO mouse livers, which indicate the role of hepatic RXR $\alpha$  in the metabolism of sterol and cholesterol. In the apoptosis pathway, 14 out of 20 anti-apoptotic genes were significantly down-regulated in KO livers, whereas only 6 were up-regulated. This finding suggests the pro-apoptotic role of hepatocyte RXR $\alpha$ . In addition to serving as a transcriptional factor, RXR $\alpha$  has a role in regulating translation as many translation-related genes were down-regulated due to RXR $\alpha$  deficiency.

There were four UIK genes, including spleen tyrosine kinase (Sykb), 3-hydroxy-3-methylglutaryl-Coenzyme A synthase 1 (Hmgcs1), isopentenyl-diphosphate delta isomerase (Idi1), and NADP dependent steroid dehydrogenase-like (Nsdhl), which were not bound by RXR $\alpha$  and are also involved in steroid and cholesterol metabolism, suggesting RXR $\alpha$  could directly and indirectly regulate steroid and cholesterol homeostasis (Figure 4A). The analysis also revealed that the pyrin-related genes including Mediterranean fever (Medv), myeloid cell nuclear differentiation antigen (Mnda), and interferon activated genes 204 and 205 (Ifi204, Ifi205) were significantly induced due to lack of hepatic RXR $\alpha$ , but they do not have RXR $\alpha$  binding sites (Figure 4A). In addition, there were 25 DIK genes without RXR $\alpha$  binding sites, which were functionally related to intracellular non-membrane-bounded organelle, ribonucleoprotein complex, ribosome, translation or structural molecule activity (Figure 4B). Additionally, biological functions of RXR $\alpha$ -bound genes (Table 3) and RXR $\alpha$ -bound non-hepatic genes (Table 4) were analyzed. The RXR $\alpha$ -bound genes were implicated extensively in metabolic process, gene expression, protein processing, cell death, and response to stress, which encompassed most of the functional pathways of

RXR $\alpha$ -dependent genes. However, the analysis of RXR $\alpha$ -bound non-hepatic genes revealed the potential role of RXR $\alpha$  in other tissues, such as neuron differentiation and development, cell adhesion, motion, and morphogenesis as well as signal transduction.

### The interaction between RXR $\alpha$ and other nuclear receptors as well as cofactor genes

Surprisingly, many steroid and orphan nuclear receptor genes were bound by RXR $\alpha$  in mouse livers (Table 5). Among these, the mRNA levels of the retinoid acid receptor beta (Rarb), nuclear receptor 1d1 (Nr1d1, Rev-erb $\alpha$ ), and Nr5a2 was significantly changed due to hepatic RXR $\alpha$  deficiency. These findings were validated by real-time PCR in livers (Figure 5). Notably, some nuclear receptor cofactors, such as peroxisome proliferative activated receptor  $\gamma$  coactivator 1  $\alpha$  (Ppargc1a),  $\beta$  (Ppargc1b), and nuclear receptor co-repressor 2 (Ncor2), were also bound by RXR $\alpha$  and Ppargc1a and Ncor2 was also expressed in an RXR $\alpha$ -dependent manner (Figure 5).

## Discussion

It has been more than two decades since the cloning of RXR $\alpha$ . Accumulated literature clearly indicates the importance of this nuclear receptor in regulating liver disease processes such as metabolic syndrome, alcoholic liver disease, chronic hepatitis C, and liver cancer, which comprise some of the most serious worldwide health issues today [2,4,5]. Thus, a global profiling of the bona fide RXR $\alpha$  genomic binding sites has become essential in order to illustrate the function and underlying regulatory mechanism mediated by RXR $\alpha$ . Using high throughput genomic methods and the knockout mouse model, the current study not

### A UIK genes without RXR $\alpha$ bindings

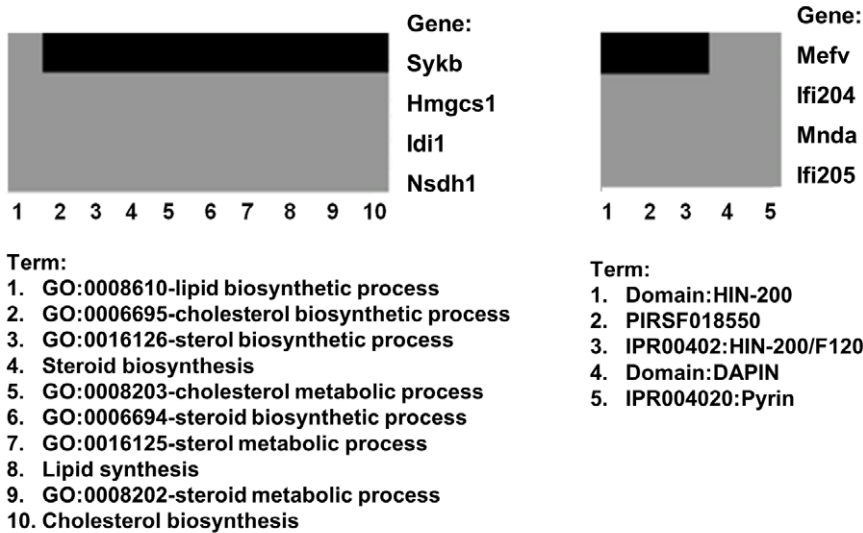

### B DIK genes without RXR $\alpha$ bindings

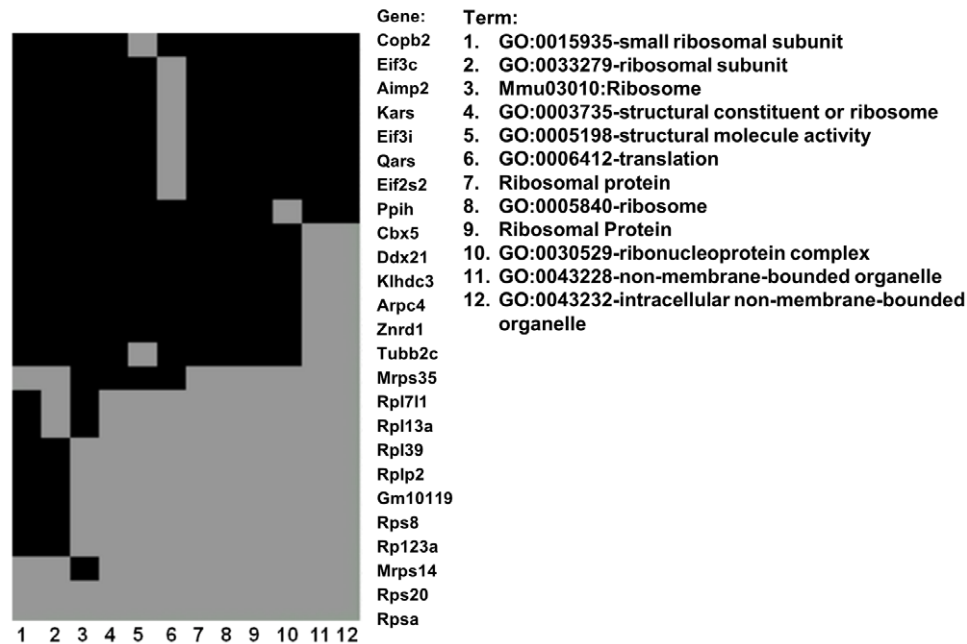

**Figure 4. Representative heat maps of functional annotation clustering of RXR $\alpha$ -dependent genes without RXR $\alpha$  binding sites.**

Genes up-regulated (A) or down-regulated (B) due to hepatic RXR $\alpha$  deficiency were subjected to DAVID functional annotation. The gene-term association relationship was generated using the functional annotation clustering tool in the DAVID website. Gray areas indicate the gene-term associations have been established by the literatures. Black areas show the gene-term relationships can exist, but requires experimental validation. Explanation for some of the listed terms shown in A: Domain: HIN-200 is a domain of HIN-200 protein, PIRSF018550 is a protein of PIR super family with serial number of 018550, IPR004021 is a domain of protein HIN-200/IF120x. Domain: DAPIN is a domain for apoptosis and interferon response. IPR004020: Pyrin is a subclass of DAPIN domain that interacts with proteins that have pyrin domain. doi:10.1371/journal.pone.0050013.g004

only identifies the *in vivo* interaction of RXR $\alpha$  and the mouse genome, but also establishes the relationship between binding and hepatic gene expression as well as biological pathways. The hepatocyte RXR $\alpha$ -deficient mice were generated by deleting the DNA binding domain of the RXR $\alpha$  [9]. Thus, the differential gene expression between WT and KO mouse livers is due to lack of direct DNA binding of RXR $\alpha$ . Our data indicated that RXR $\alpha$  bound 78.7% of hepatic expressed genes and more than 80% of

RXR $\alpha$ -dependent genes revealing the direct extensive role of RXR $\alpha$  in regulating liver gene expression and liver function. Additionally, 202 RXR $\alpha$ -binding free genes also displayed an RXR $\alpha$ -dependent expression pattern. These genes could be regulated by RXR $\alpha$  indirectly or post-transcriptionally. Moreover, RXR $\alpha$  binding sites were located in all of the mouse chromosomes as well as the mitochondrial DNA. However, the enriched bindings on chromosome 5 and 11 and rare bindings on Y

**Table 3.** Biological Functional Analysis of RXR $\alpha$ -bound Genes.

| David Biological Functional Annotation                                                       | Number of gene (%) | p value  | Bonferroni |
|----------------------------------------------------------------------------------------------|--------------------|----------|------------|
| regulation of transcription                                                                  | 1605 (11.8)        | 3.20E-14 | 1.90E-10   |
| Transcription                                                                                | 1329 (9.8)         | 7.70E-22 | 4.70E-18   |
| intracellular signaling cascade                                                              | 729 (5.4)          | 2.80E-23 | 1.70E-19   |
| phosphate metabolic process                                                                  | 696 (5.1)          | 3.90E-24 | 2.30E-20   |
| phosphorus metabolic process                                                                 | 696 (5.1)          | 3.90E-24 | 2.30E-20   |
| protein localization                                                                         | 613 (4.5)          | 6.40E-24 | 3.90E-20   |
| phosphorylation                                                                              | 575 (4.2)          | 2.20E-19 | 1.30E-15   |
| oxidation reduction                                                                          | 559 (4.1)          | 3.00E-26 | 1.80E-22   |
| establishment of protein localization                                                        | 531 (3.9)          | 8.90E-20 | 5.40E-16   |
| protein transport                                                                            | 527 (3.9)          | 1.20E-19 | 7.20E-16   |
| protein amino acid phosphorylation                                                           | 514 (3.8)          | 7.10E-18 | 4.30E-14   |
| macromolecule catabolic process                                                              | 504 (3.7)          | 1.80E-11 | 1.10E-07   |
| positive regulation of macromolecule metabolic process                                       | 497 (3.7)          | 1.00E-13 | 6.10E-10   |
| regulation of transcription from RNA polymerase II promoter                                  | 478 (3.5)          | 9.70E-12 | 5.80E-08   |
| positive regulation of biosynthetic process                                                  | 439 (3.2)          | 1.10E-12 | 6.60E-09   |
| positive regulation of cellular biosynthetic process                                         | 436 (3.2)          | 7.20E-13 | 4.30E-09   |
| protein catabolic process                                                                    | 436 (3.2)          | 5.40E-12 | 3.30E-08   |
| positive regulation of macromolecule biosynthetic process                                    | 423 (3.1)          | 8.30E-14 | 5.00E-10   |
| positive regulation of nitrogen compound metabolic process                                   | 418 (3.1)          | 4.10E-13 | 2.50E-09   |
| positive regulation of nucleobase, nucleoside, nucleotide and nucleic acid metabolic process | 407 (3.0)          | 2.70E-13 | 1.60E-09   |
| negative regulation of macromolecule metabolic process                                       | 401 (2.9)          | 2.70E-12 | 1.60E-08   |
| cell death                                                                                   | 398 (2.9)          | 3.80E-11 | 2.30E-07   |
| positive regulation of gene expression                                                       | 390 (2.9)          | 5.90E-13 | 3.60E-09   |
| positive regulation of transcription                                                         | 384 (2.8)          | 3.70E-14 | 2.20E-10   |
| intracellular transport                                                                      | 354 (2.6)          | 5.00E-15 | 3.00E-11   |
| cellular response to stress                                                                  | 325 (2.4)          | 1.30E-11 | 7.90E-08   |
| nitrogen compound biosynthetic process                                                       | 253 (1.9)          | 7.40E-13 | 4.50E-09   |
| cellular macromolecule localization                                                          | 250 (1.8)          | 6.90E-12 | 4.20E-08   |
| cellular protein localization                                                                | 248 (1.8)          | 1.10E-11 | 6.80E-08   |
| cofactor metabolic process                                                                   | 161 (1.2)          | 1.90E-12 | 1.10E-08   |

doi:10.1371/journal.pone.0050013.t003

chromosome suggest specific biological functions of RXR $\alpha$ . The current study also presented evidence for the potential role of RXR $\alpha$  in regulating mitochondrial gene function. Since mitochondria DNA is maternally derived, the finding is congruent with the specific binding of RXR $\alpha$  to the X chromosome. These observations suggest a gender-specific effect of RXR $\alpha$ . Taken together; the data indicate the extensive biological action of endogenous RXR $\alpha$  ligands such as retinoic acid and fatty acids in the liver. RXR has three isoforms. Among them, RXR $\alpha$  has the highest expression level in the liver. It would be important to study the differential and redundant role of RXR $\beta$  and  $\gamma$  using the same approach.

Promoter and enhancer regions are regarded as the most important regulatory regions in the control of transcription [44]. Comparing the distribution of RXR $\alpha$  binding sites in non-hepatic, hepatic, and RXR $\alpha$ -dependent genes, RXR $\alpha$  bindings occurred more frequently within the coding and promoter regions for hepatic than non-hepatic genes. However, the distribution profile of RXR $\alpha$  binding was similar between RXR $\alpha$ -dependent and -independent genes. Thus, it seems like direct binding of RXR $\alpha$

does not necessarily affect baseline mRNA levels. There are several potential reasons for this. Firstly, the effect of RXRs might be redundant and the presence of RXR $\beta$  and  $\gamma$  in hepatocyte RXR $\alpha$ -deficient mouse liver may be sufficient to maintain the basal transcriptional machinery of the hepatic RXR target genes. Secondly, albumin-*cre* recombinase was used to produce the RXR $\alpha$  knockout mice. Since albumin is predominantly expressed in the hepatocyte, it is also possible that some of those RXR $\alpha$ -bound genes are predominantly expressed in other types of liver cells rather than hepatocytes. Thus, RXR $\alpha$  deficiency does not alter the hepatic mRNA level. Thirdly, RXR $\alpha$  binding can be “silent”. Active gene transcription occurs upon ligand binding, which leads to recruitment of many other factors and Pol II. It is possible that the biological level of RXR $\alpha$  ligands is not sufficient to induce gene transactivation and thus knockout RXR $\alpha$  has no impact on basal mRNA level. Additional experiments that use pharmacological ligands such as retinoic acids and polyunsaturated fatty acids to activate RXR $\alpha$  are needed to identify exogenous ligand/RXR $\alpha$ -dependent genes. The expression of gene is tissue specific. Figure 1A shows that there are 7642 genes have RXR $\alpha$



**Table 4.** Biological Functional Analysis of RXR $\alpha$ -bound non-Hepatic Genes.

| David Biological Functional Annotation                  | Number of gene (%) | p value  | Bonferroni |
|---------------------------------------------------------|--------------------|----------|------------|
| regulation of transcription                             | 703 (10.8)         | 2.10E-07 | 9.00E-04   |
| transcription                                           | 554 (8.5)          | 2.00E-05 | 0.084      |
| regulation of RNA metabolic process                     | 494 (7.6)          | 2.80E-08 | 1.20E-04   |
| regulation of transcription, DNA-dependent              | 493 (7.6)          | 3.60E-09 | 1.60E-05   |
| ion transport                                           | 253 (3.9)          | 3.50E-07 | 0.002      |
| cell adhesion                                           | 198 (3.0)          | 1.20E-05 | 0.052      |
| biological adhesion                                     | 198 (3.0)          | 1.40E-05 | 0.059      |
| metal ion transport                                     | 166 (2.5)          | 1.10E-06 | 0.005      |
| neuron differentiation                                  | 163 (2.5)          | 2.10E-09 | 9.00E-06   |
| cell motion                                             | 138 (2.1)          | 9.00E-06 | 0.039      |
| cell-cell signaling                                     | 120 (1.8)          | 1.40E-07 | 6.30E-04   |
| neuron development                                      | 117 (1.8)          | 1.50E-06 | 0.006      |
| regulation of small GTPase mediated signal transduction | 101 (1.5)          | 3.00E-08 | 1.30E-04   |
| cell part morphogenesis                                 | 87 (1.3)           | 1.30E-05 | 0.054      |
| cell projection morphogenesis                           | 86 (1.3)           | 2.60E-06 | 0.011      |
| regulation of Ras protein signal transduction           | 77 (1.2)           | 9.30E-06 | 0.04       |
| cell morphogenesis involved in neuron differentiation   | 77 (1.2)           | 1.20E-05 | 0.051      |
| synaptic transmission                                   | 76 (1.2)           | 9.20E-06 | 0.04       |
| neuron projection morphogenesis                         | 74 (1.1)           | 2.30E-05 | 0.096      |
| axonogenesis                                            | 70 (1.1)           | 1.70E-05 | 0.072      |
| axon guidance                                           | 50 (0.8)           | 1.10E-06 | 0.005      |
| spinal cord development                                 | 27 (0.4)           | 2.40E-05 | 0.099      |

doi:10.1371/journal.pone.0050013.t004

binding, but mRNA levels of those genes cannot be detected in the liver. Those genes might be expressed in the non-hepatic tissues such as neuron and skeletal muscle. We speculate that RXR $\alpha$  might have the most extensive binding in the liver genome since it

has the highest expression level in the liver. Those binding sites may also exist in the DNA derived from other tissues.

As a master nuclear receptor, RXR $\alpha$  plays an essential role in effecting the biological actions of other adopted orphan nuclear

**Table 5.** Nuclear Receptor and Cofactor Genes that Bound by RXR $\alpha$ .

| Endocrine receptors | Orphan nuclear receptors |        |                            | Nuclear Receptor cofactors |
|---------------------|--------------------------|--------|----------------------------|----------------------------|
| Ar                  | Hnf1a                    | Rara   | Nr1d1 (Rev-erb $\alpha$ )* | Ppargc1a*                  |
| Nr3c1 (Gr)          | Hnf1b                    | Rarb*  | Nr1d2(Rev-erb $\beta$ )    | Ppargc1b                   |
| Nr3c2 (Mr)          | Hnf4a                    | Rarg   | Nr2c1 (Tr2)                | Ncor2*                     |
| Esr1                | Nr1h3 (Lxr)              | Rxra   | Nr2c2 (Tr4)                | Thrap3                     |
| Esr2                | Nr1h4 (Fxr $\alpha$ )    | Rxrb   | Nr2e3 (Pnr)                |                            |
| Pgr                 | Nr1h5 (Fxr $\beta$ )     | Rxrg   | Nr2f1 (COUP-TF1)           |                            |
|                     | Nr1i2 (Pxr)              | Thra   | Nr2f2 (COUP-TF2)           |                            |
|                     | Nr1i3 (Car)              | Thrb   | Nr2f6 (COUP-TF3)           |                            |
|                     | Ppara                    | Rora   | Nr4a1 (Nur77)              |                            |
|                     | Ppard                    | Rorc   | Nr4a3 (Nor1)               |                            |
|                     | Pparg                    | Ror1   | Nr6a1 (Gcnf)               |                            |
|                     | Esrra                    | Ror2   | Nr0b2 (Shp1)               |                            |
|                     | Esrrb                    | Nr5a1  |                            |                            |
|                     | Esrrg                    | Nr5a2* |                            |                            |

\*: RXR $\alpha$ -dependent genes confirmed by real-time PCR.

doi:10.1371/journal.pone.0050013.t005

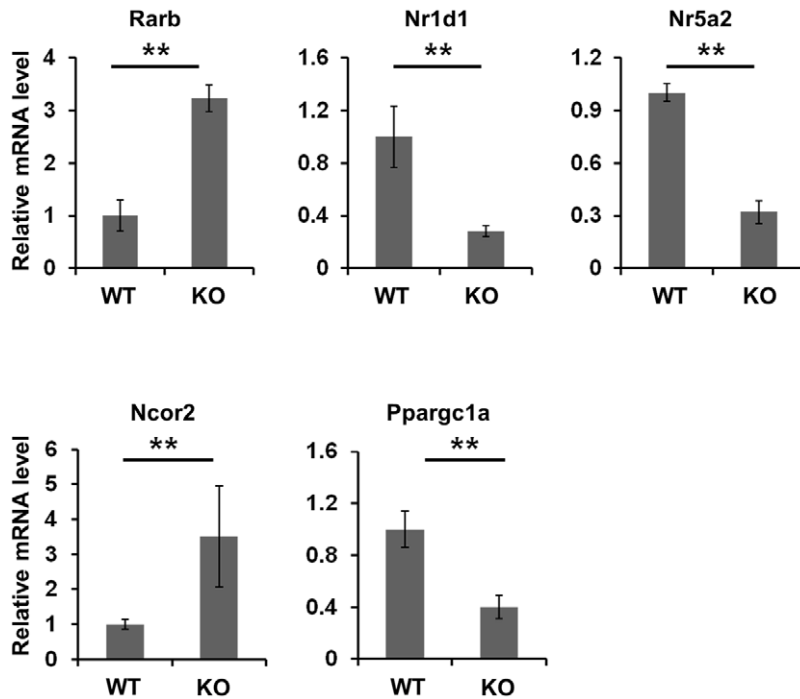

**Figure 5. Expression of genes in wild type and RXR $\alpha$ -null livers.** RNA extracted from wild type and RXR $\alpha$ -null livers (n = 3–4) were subjected to real time PCR to determine the expression level of the studied genes. Data were normalized to glyceraldehyde 3-phosphate dehydrogenase (GAPDH) mRNA level. \*\*:  $p < 0.05$  in comparisons between two groups. Microarray experiment showed that fold change in Rar $\beta$ , Nr1d1, Nr5a2, Ncor2, and Ppargc1a mRNA levels due to hepatic RXR $\alpha$  deficiency was 1.8, 0.7, 0.5, 1.3, and 0.3, respectively (n = 3,  $p < 0.05$ ). doi:10.1371/journal.pone.0050013.g005

receptors. Based on the “1–2–3–4–5 rule”, RXR and its partners preferentially bind to specific motifs composed of hexamers (A/GGGTCA) separated by a various number of nucleotides [45]. For example, DR1 is a preferred motif for peroxisome proliferator activator receptors (PPAR)/RXR heterodimer and RXR homodimer. DR4 is the preferred binding site for liver x receptor and thyroid hormone receptor [1,46], and IR1 is the preferred motif for farnesoid x receptor [47]. DR3, DR4, and ER6 are usually recognized by pregnane x receptor [48]. DR2 and 5 are the main binding motifs for retinoic acid receptor [1,45]. Therefore, the specific heterodimeric partners of RXR $\alpha$  that are involved in the regulatory process can be predicted based on the motif. The present data showed that DR1 was the most common motif, followed by DR4, IR1, and DR3. According to the “1–2–3–4–5 rule” mentioned above, PPAR/RXR $\alpha$  heterodimer and RXR $\alpha$  homodimer may be the dominant regulators followed by LXR, FXR, and PXR in the liver. In agreement with this finding, a recent study showed that 67.7% and 25.7% of RXR $\alpha$  binding sites overlap with those of PPAR $\alpha$  and LXR, respectively, in normal mouse livers [49]. Furthermore, the finding is consistent with the phenotype of hepatocyte RXR $\alpha$ -deficient mice, which have elevated serum cholesterol and triglyceride levels [16]. In addition, lipid, bile acid, and xenobiotic metabolism are altered when the hepatocyte RXR $\alpha$ -deficient mice are challenged with exogenous ligands for those receptors [10,12]. Notably, analysis of common sequences of the 500 strongest RXR $\alpha$  peaks demonstrated that GC box, the motif of Sp1, may be one of the most popular motifs for RXR $\alpha$  binding. Consistently, it has been shown that there is a thyroid hormone response element overlapping with the GC box in the promoter of the epidermal growth factor receptor, where it is bound competitively by RXR/T3R and Sp1 [42]. Furthermore, a physical interaction between RAR/RXR and Sp1 has also been

reported and such interaction synergistically enhances the expression of RA-induced genes *in vitro* [50]. Our findings suggest the presence of extensive crosstalk between Sp1 and RXR $\alpha$  and their collaborative or competitive regulatory role in regulating liver gene transcription.

Recent studies have reported the mouse liver genome-wide binding profile of FXR [26], PXR [33], LXR, and PPAR $\alpha$  [49]. Comparing the RXR $\alpha$  ChIP-seq data from this study with others' findings, common bindings were aligned between RXR $\alpha$  and its partners (data not shown). Accordingly, biological functional analysis of RXR $\alpha$ -bound genes (Table 3) encompassed almost all its partners' biological functions. In addition, we identified novel pathways that are specific for RXR $\alpha$ , which include oxidation/reduction, protein localization, intracellular signaling cascade, regulation of transcription, cofactor metabolic process, cellular response to stress, and cell death. Furthermore, novel potential of RXR $\alpha$  was also unveiled by the analysis of RXR $\alpha$ -bound non-hepatic genes. Based on binding and expression profiling generated from wild type and knockout mice, this paper is the first to establish the relationship between binding and expression in an RXR $\alpha$ -dependent manner.

It is important to note that our results did not show any significant correlation between peak score and the fold change in mRNA level caused by RXR $\alpha$  deficiency. In addition, the binding characteristic (location of the peak) is similar between UIK and DIK genes. This finding suggests that physical interaction of RXR $\alpha$  is essential, but not sufficient for predicting the subsequent transcriptional effect.

The role of retinoids in other organs such as the eye and skin is well known. However, retinoids are stored, processed, and metabolized in the liver. In addition, the liver is also a retinoid target organ and yet the action of retinoids in the liver has been

overlooked. This study, for the first time, demonstrates the potential biological effect of endogenous ligands of RXR $\alpha$  in the liver. Taken together, as an active partner of many nuclear receptors, our reported data showed that RXR $\alpha$  and its endogenous ligands control liver metabolism and function in general.

## Acknowledgments

The authors thank Dr. Stan Svojanovsky for his assistance in microarray data processing. We also thank Zoe Raglow and Julia Wu for editing the

manuscript, and Drs. Grace Guo, Ann Thomas, and Yue Cui for sharing with us the technique of ChIP assay and the methodology of data analysis.

## Author Contributions

Conceived and designed the experiments: QZ YYW. Performed the experiments: QZ YH HL. Analyzed the data: QZ YF YH JF. Contributed reagents/materials/analysis tools: QZ YF YH. Wrote the paper: QZ YYW.

## References

- De Luca LM (1991) Retinoids and their receptors in differentiation, embryogenesis, and neoplasia. *FASEB J* 5: 2924–2933.
- Shulman AI, Mangelsdorf DJ (2005) Retinoid x receptor heterodimers in the metabolic syndrome. *N Engl J Med* 353: 604–615.
- Lawrence JA, Merino MJ, Simpson JF, Manrow RE, Page DL, et al. (1998) A high-risk lesion for invasive breast cancer, ductal carcinoma in situ, exhibits frequent overexpression of retinoid X receptor. *Cancer Epidemiol Biomarkers Prev* 7: 29–35.
- Wu C, Gilroy R, Taylor R, Olyae M, Abdulkarim B, et al. (2011) Alteration of hepatic nuclear receptor-mediated signaling pathways in hepatitis C virus patients with and without a history of alcohol drinking. *Hepatology* 54: 1966–1974.
- Qu L, Tang X (2010) Bexarotene: a promising anticancer agent. *Cancer Chemother Pharmacol* 65: 201–205.
- Magliocco MA, Pandya K, Dombrovskiy V, Christiansen L, Wong Y, et al. (2006) A randomized, double-blind, vehicle-controlled, bilateral comparison trial of bexarotene gel 1% versus vehicle gel in combination with narrowband UVB phototherapy for moderate to severe psoriasis vulgaris. *J Am Acad Dermatol* 54: 115–118.
- Germain P, Chambon P, Eichele G, Evans RM, Lazar MA, et al. (2006) International Union of Pharmacology. LXIII. Retinoid X receptors. *Pharmacol Rev* 58: 760–772.
- Sucov HM, Dyson E, Gumeringer CL, Price J, Chien KR, et al. (1994) RXR alpha mutant mice establish a genetic basis for vitamin A signaling in heart morphogenesis. *Genes Dev* 8: 1007–1018.
- Wan YJ, An D, Cai Y, Repa JJ, Hung-Po Chen T, et al. (2000) Hepatocyte-specific mutation establishes retinoid X receptor alpha as a heterodimeric integrator of multiple physiological processes in the liver. *Mol Cell Biol* 20: 4436–4444.
- Wan YJ, Cai Y, Lungo W, Fu P, Locker J, et al. (2000) Peroxisome proliferator-activated receptor alpha-mediated pathways are altered in hepatocyte-specific retinoid X receptor alpha-deficient mice. *J Biol Chem* 275: 28285–28290.
- Wan YJ, Han G, Cai Y, Dai T, Konishi T, et al. (2003) Hepatocyte retinoid X receptor-alpha-deficient mice have reduced food intake, increased body weight, and improved glucose tolerance. *Endocrinology* 144: 605–611.
- Cai Y, Dai T, Ao Y, Konishi T, Chuang KH, et al. (2003) Cytochrome P450 genes are differentially expressed in female and male hepatocyte retinoid X receptor alpha-deficient mice. *Endocrinology* 144: 2311–2318.
- Wu Y, Zhang X, Bardag-Gorce F, Robel RC, Aguilo J, et al. (2004) Retinoid X receptor alpha regulates glutathione homeostasis and xenobiotic detoxification processes in mouse liver. *Mol Pharmacol* 65: 550–557.
- Gyamfi MA, Kocsis MG, He L, Dai G, Mendy AJ, et al. (2006) The role of retinoid X receptor alpha in regulating alcohol metabolism. *J Pharmacol Exp Ther* 319: 360–368.
- Gyamfi MA, He L, French SW, Damjanov I, Wan YJ (2008) Hepatocyte retinoid X receptor alpha-dependent regulation of lipid homeostasis and inflammatory cytokine expression contributes to alcohol-induced liver injury. *J Pharmacol Exp Ther* 324: 443–453.
- Gyamfi MA, Tanaka Y, He L, Klaassen CD, Wan YJ (2009) Hepatic effects of a methionine-choline-deficient diet in hepatocyte RXRalpha-null mice. *Toxicol Appl Pharmacol* 234: 166–178.
- Yang X, Guo M, Wan YJ (2010) Deregulation of growth factor, circadian clock, and cell cycle signaling in regenerating hepatocyte RXRalpha-deficient mouse livers. *Am J Pathol* 176: 733–743.
- Guo M, Gong L, He L, Lehman-McKeeman L, Wan YJ (2008) Hepatocyte RXRalpha deficiency in matured and aged mice: impact on the expression of cancer-related hepatic genes in a gender-specific manner. *BMC genomics* 9: 403.
- Langmead B, Trapnell C, Pop M, Salzberg SL (2009) Ultrafast and memory-efficient alignment of short DNA sequences to the human genome. *Genome Biol* 10: R25.
- Zhang Y, Liu T, Meyer CA, Eeckhoutte J, Johnson DS, et al. (2008) Model-based Analysis of ChIP-Seq (MACS). *Genome Biology* 9: R137.
- Machanic P, Bailey TL (2011) MEME-ChIP: motif analysis of large DNA datasets. *Bioinformatics* 27: 1696–1697.
- Sandelin A, Wasserman WW (2005) Prediction of nuclear hormone receptor response elements. *Mol Endocrinol* 19: 595–606.
- Desai DS, Hirai S, Karnes WE, Jr., Niles RM, Ohno S (1999) Cloning and characterization of the murine PKC alpha promoter: identification of a retinoic acid response element. *Biochem Biophys Res Commun* 263: 28–34.
- Loudig O, Maclean GA, Dore NL, Luu L, Petkovich M (2005) Transcriptional co-operativity between distant retinoic acid response elements in regulation of Cyp26A1 inducibility. *Biochem J* 392: 241–248.
- de The H, Vivanco-Ruiz MM, Tiollais P, Stunnenberg H, Dejean A (1990) Identification of a retinoic acid responsive element in the retinoic acid receptor beta gene. *Nature* 343: 177–180.
- Thomas AM, Hart SN, Kong B, Fang J, Zhong XB, et al. (2010) Genome-wide tissue-specific farnesoid X receptor binding in mouse liver and intestine. *Hepatology* 51: 1410–1419.
- Costet P, Luo Y, Wang N, Tall AR (2000) Sterol-dependent transactivation of the ABC1 promoter by the liver X receptor/retinoid X receptor. *J Biol Chem* 275: 28240–28245.
- Joseph SB, Laffitte BA, Patel PH, Watson MA, Matsukuma KE, et al. (2002) Direct and indirect mechanisms for regulation of fatty acid synthase gene expression by liver X receptors. *J Biol Chem* 277: 11019–11025.
- Mak PA, Kast-Woelbern HR, Anisfeld AM, Edwards PA (2002) Identification of PLTP as an LXR target gene and apoE as an FXR target gene reveals overlapping targets for the two nuclear receptors. *J Lipid Res* 43: 2037–2041.
- Dreyer C, Krey G, Keller H, Givel F, Helftenbein G, et al. (1992) Control of the peroxisomal beta-oxidation pathway by a novel family of nuclear hormone receptors. *Cell* 68: 879–887.
- Ashibe B, Motojima K (2009) Fatty aldehyde dehydrogenase is up-regulated by polyunsaturated fatty acid via peroxisome proliferator-activated receptor alpha and suppresses polyunsaturated fatty acid-induced endoplasmic reticulum stress. *FEBS J* 276: 6956–6970.
- Buroker NE, Barboza J, Huang JY (2009) The IkappaBalpha gene is a peroxisome proliferator-activated receptor cardiac target gene. *FEBS J* 276: 3247–3255.
- Cui JY, Gunewardena SS, Rockwell CE, Klaassen CD (2010) ChIPing the cistrome of PXR in mouse liver. *Nucleic Acids Res* 38: 7943–7963.
- Honkakoski P, Negishi M (1997) Characterization of a phenobarbital-responsive enhancer module in mouse P450 Cyp2b10 gene. *J Biol Chem* 272: 14943–14949.
- Kast HR, Goodwin B, Tarr PT, Jones SA, Anisfeld AM, et al. (2002) Regulation of multidrug resistance-associated protein 2 (ABCC2) by the nuclear receptors pregnane X receptor, farnesoid X-activated receptor, and constitutive androstane receptor. *J Biol Chem* 277: 2908–2915.
- Noda M, Vogel RL, Craig AM, Prah J, DeLuca HF, et al. (1990) Identification of a DNA sequence responsible for binding of the 1,25-dihydroxyvitamin D3 receptor and 1,25-dihydroxyvitamin D3 enhancement of mouse secreted phosphoprotein 1 (SPP-1 or osteopontin) gene expression. *Proc Natl Acad Sci U S A* 87: 9995–9999.
- Zierold C, Mings JA, DeLuca HF (2003) Regulation of 25-hydroxyvitamin D3-24-hydroxylase mRNA by 1,25-dihydroxyvitamin D3 and parathyroid hormone. *J Cell Biochem* 88: 234–237.
- Meyer MB, Goetsch PD, Pike JW (2010) Genome-wide analysis of the VDR/RXR cistrome in osteoblast cells provides new mechanistic insight into the actions of the vitamin D hormone. *J Steroid Biochem Mol Biol* 121: 136–141.
- Shin DJ, Plateroti M, Samarut J, Osborne TF (2006) Two uniquely arranged thyroid hormone response elements in the far upstream 5' flanking region confer direct thyroid hormone regulation to the murine cholesterol 7alpha hydroxylase gene. *Nucleic Acids Res* 34: 3853–3861.
- Sudo Y, Mariash CN (1994) Two glucose-signaling pathways in S14 gene transcription in primary hepatocytes: a common role of protein phosphorylation. *Endocrinology* 134: 2532–2540.
- Liu B, Li W, Mariash CN (1999) Two different gene elements are required for glucose regulation of S14 transcription. *Mol Cell Endocrinol* 148: 11–19.
- Xu J, Thompson KL, Shephard LB, Hudson LG, Gill GN (1993) T3 receptor suppression of Sp1-dependent transcription from the epidermal growth factor receptor promoter via overlapping DNA-binding sites. *J Biol Chem* 268: 16065–16073.
- Dynan WS, Tjian R (1983) The promoter-specific transcription factor Sp1 binds to upstream sequences in the SV40 early promoter. *Cell* 35: 79–87.

44. Levine M, Tjian R (2003) Transcription regulation and animal diversity. *Nature* 424: 147–151.
45. Tata JR (2002) Signalling through nuclear receptors. *Nat Rev Mol Cell Biol* 3: 702–710.
46. Willy PJ, Umesono K, Ong ES, Evans RM, Heyman RA, et al. (1995) LXR, a nuclear receptor that defines a distinct retinoid response pathway. *Genes Dev* 9: 1033–1045.
47. Laffitte BA, Kast HR, Nguyen CM, Zavacki AM, Moore DD, et al. (2000) Identification of the DNA binding specificity and potential target genes for the farnesoid X-activated receptor. *J Biol Chem* 275: 10638–10647.
48. Kliewer SA, Goodwin B, Willson TM (2002) The nuclear pregnane X receptor: a key regulator of xenobiotic metabolism. *Endocr Rev* 23: 687–702.
49. Boergesen M, Pedersen TA, Gross B, van Heeringen SJ, Hagenbeck D, et al. (2012) Genome-Wide Profiling of Liver X Receptor, Retinoid X Receptor, and Peroxisome Proliferator-Activated Receptor alpha in Mouse Liver Reveals Extensive Sharing of Binding Sites. *Mol Cell Biol* 32: 852–867.
50. Shimada J, Suzuki Y, Kim SJ, Wang PC, Matsumura M, et al. (2001) Transactivation via RAR/RXR-Sp1 interaction: characterization of binding between Sp1 and GC box motif. *Mol Endocrinol* 15: 1677–1692.
